# Supplementary material
Source: HighWire-hosted journal article supplement (https://www.ajevonline.org/highwire/filestream/9347/field_highwire_adjunct_files/0/250-supplemental_data.pdf)
Supplement: 250-supplemental_data.pdf [file 250-supplemental_data.pdf]

**Supplemental Data for:**

Štajner, N., D. Rusjan, Z. Korošec-Koruza, and B. Javornik. 2011.

Genetic Characterization of Old Slovenian Grapevine Varieties of *Vitis vinifera* L.

by Microsatellite Genotyping

Am. J. Enol. Vitic. 62:250–255.

doi:10.5344/ajev.2011.10011.

**Supplemental Figure 1** Phenogram of Slovenian and other European grapevine varieties using D = 1- (proportion of shared alleles) as genetic distance and UPGMA as the grouping method. Slovenian varieties are named in the phenogram; names of European varieties are listed in Supplemental Table 1.

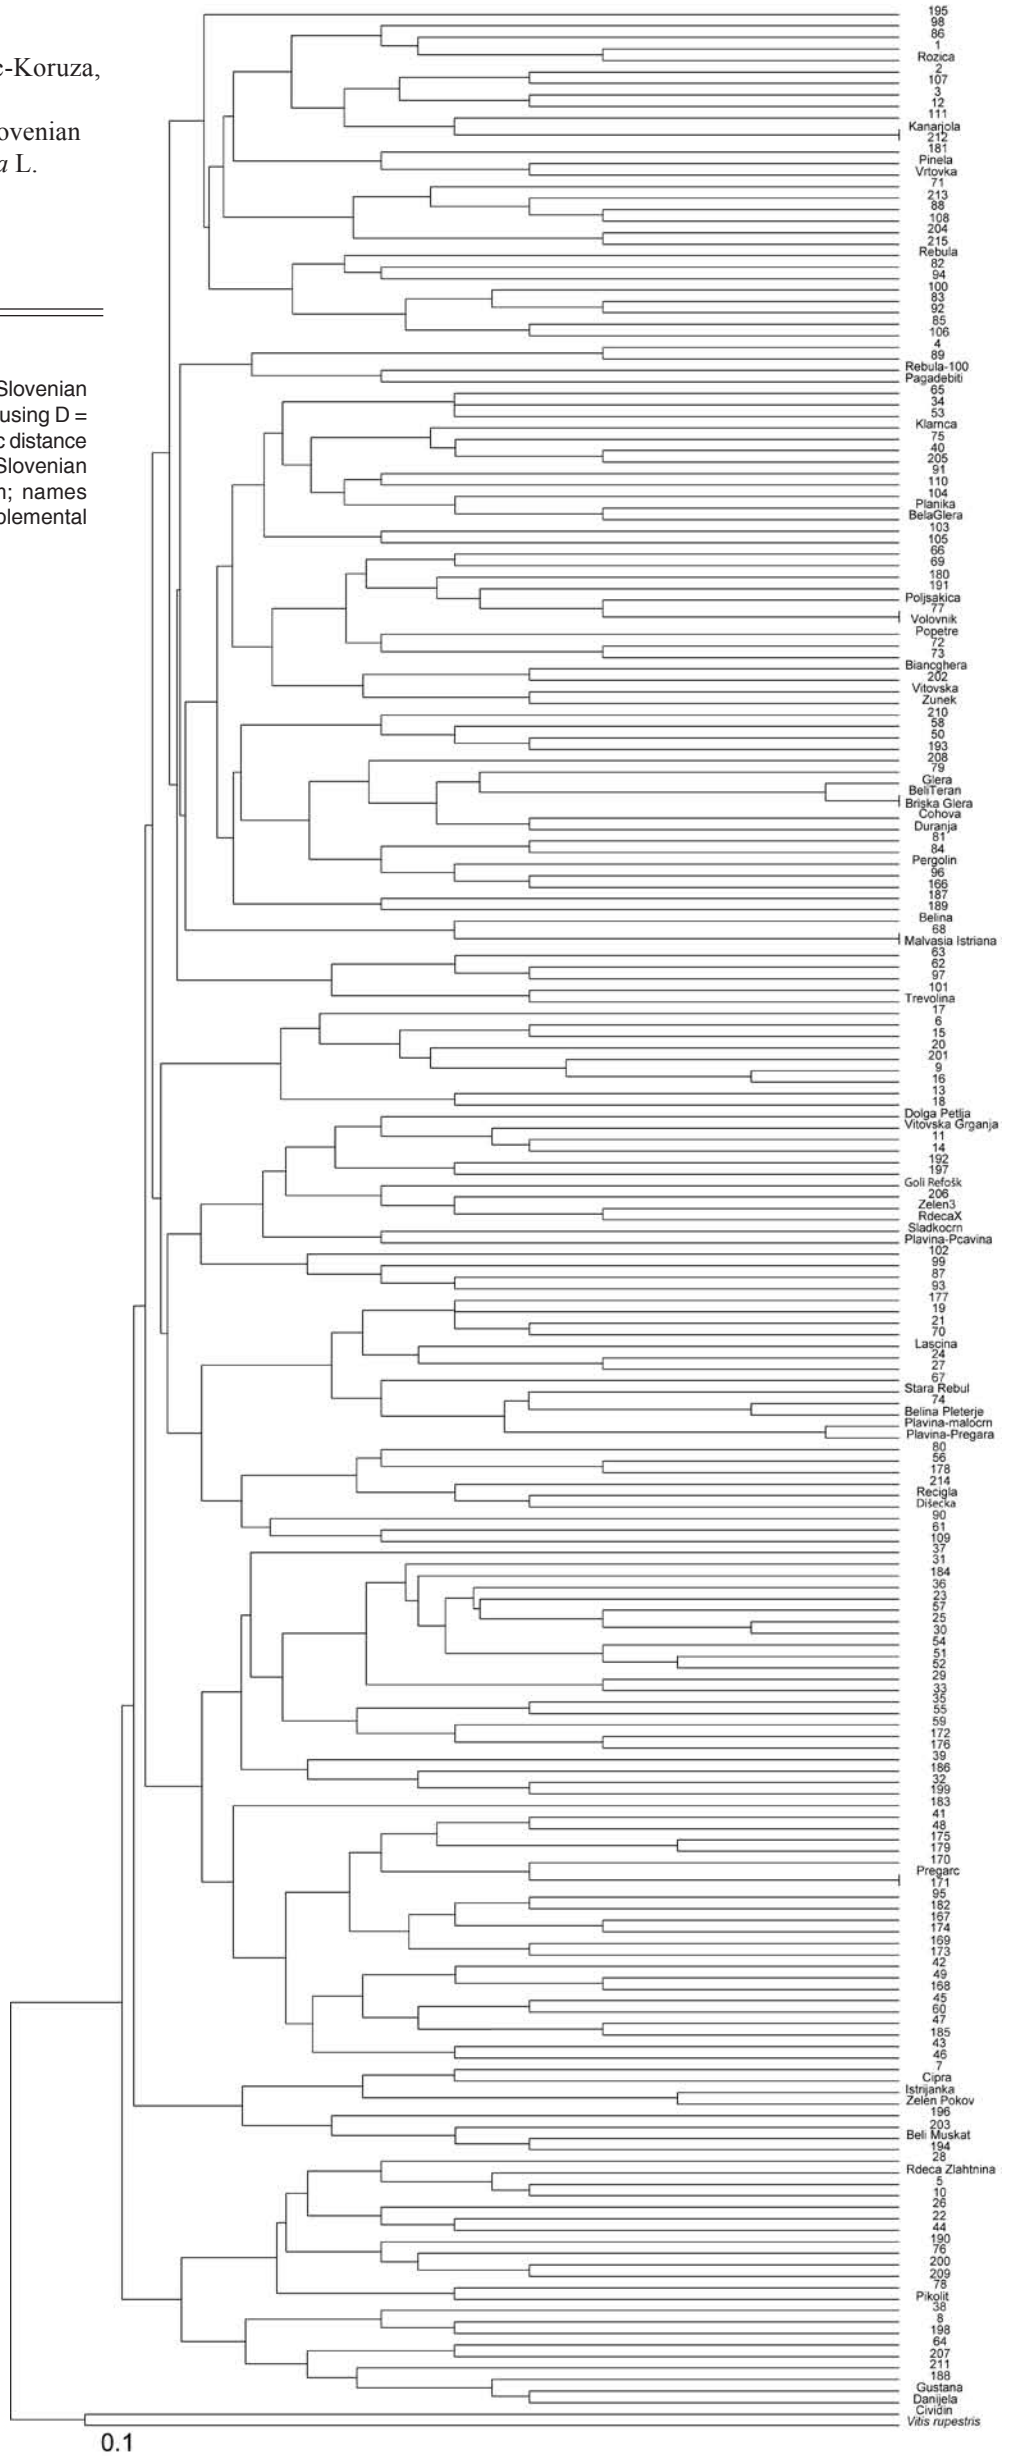

0.1

**Supplemental Data for:**

Štajner, N., D. Rusjan, Z. Korošec-Koruza, and B. Javornik. 2011.

Genetic Characterization of Old Slovenian Grapevine Varieties of *Vitis vinifera* L. by Microsatellite Genotyping

Am. J. Enol. Vitic. 62:250–255. doi:10.5344/ajev.2011.10011.

**Supplemental Table 1** List of names of European and Slovenian varieties included in the phenogram in Supplemental Figure 1.

|    |                     |     |                            |     |                          |
|----|---------------------|-----|----------------------------|-----|--------------------------|
| 1  | Blauburger          | 73  | Posip Crni                 | 145 | Zelen Pokov              |
| 2  | Blaufränkisch       | 74  | Ranfol                     | 146 | Zelen2.4 <sup>d</sup>    |
| 3  | Elbling             | 75  | Skrlet                     | 147 | Poljšakica Lože          |
| 4  | Geißtutte           | 76  | Teran                      | 148 | Planika                  |
| 5  | Goldburger          | 77  | Vela Pergolla              | 149 | Bela Glera               |
| 6  | Jubiläumsrebe       | 78  | Vrbnicka Zlahtina          | 150 | Briška Glera             |
| 7  | Königsast           | 79  | Zilavka                    | 151 | Guštana                  |
| 8  | Müller Thurgau      | 80  | Akominato                  | 152 | Vitovska Grganja         |
| 9  | Neuburger           | 81  | Aetonychi                  | 153 | Pergolin                 |
| 10 | Orangetraube        | 82  | Agiorgitiko                | 154 | Danijela                 |
| 11 | Österreichisch Weiß | 83  | Ákiki                      | 155 | Vrtovka                  |
| 12 | Rheinriesling       | 84  | Voidamato Lasithiou        | 156 | Dišečka                  |
| 13 | Rotgipfler          | 85  | Dafnia                     | 157 | Dolga Petlja             |
| 14 | Schlagerblut        | 86  | Dermatas                   | 158 | Volovnik                 |
| 15 | Silvaner Grün       | 87  | Eftakoilo                  | 159 | Cividin                  |
| 16 | Veltliner Frührot   | 88  | Fokiano                    | 160 | Zunek                    |
| 17 | Veltliner Grün      | 89  | Karatsova Naousis          | 161 | Rečigla                  |
| 18 | Veltliner Rot       | 90  | Kolokythas Iefkos          | 162 | Klarnca                  |
| 19 | Wildbacher Blau     | 91  | Kotsifali                  | 163 | Pikolit                  |
| 20 | Zierfandler         | 92  | Krystalli                  | 164 | <i>Vitis rupestris</i>   |
| 21 | Aligoté             | 93  | Kritiko mavro              | 165 | Rdeča Žlahtnina          |
| 22 | Cabernet franc      | 94  | Liatiko                    | 166 | Airen                    |
| 23 | Cabernet Sauvignon  | 95  | Mantilaria                 | 167 | Alarije                  |
| 24 | Chardonnay          | 96  | Mavrodaphni                | 168 | Blanca Cayetana          |
| 25 | Chenin blanc        | 97  | Merkouri                   | 169 | Bobal                    |
| 26 | Cot                 | 98  | Moschofilero               | 170 | Garnacha                 |
| 27 | Gamay               | 99  | Nychato                    | 171 | Garnacha Tintorera       |
| 28 | Merlot              | 100 | Petrachladi                | 172 | Godello                  |
| 29 | Pinot               | 101 | Plyto                      | 173 | Juan Ibanez              |
| 30 | Sauvignon blanc     | 102 | Psevdosyriko               | 174 | Macabeo                  |
| 31 | Semillon            | 103 | Roditis kokkinos           | 175 | Malvar                   |
| 32 | Shiraz              | 104 | Romeiko                    | 176 | Maturana                 |
| 33 | St. Laurent         | 105 | Romeiko Machaira           | 177 | Matza zuri               |
| 34 | Alfrocheiro         | 106 | Syriki                     | 178 | Mouraton                 |
| 35 | Arinto de Bucelas   | 107 | Theiako                    | 179 | Merseguera               |
| 36 | Arinto no Douro     | 108 | Thrapsathiri               | 180 | Monastrell               |
| 37 | Avesso              | 109 | Tsaousi                    | 181 | Ondarrabi Beltza         |
| 38 | Azal Branco         | 110 | Vidiano                    | 182 | Pedro Ximenez            |
| 39 | Baga                | 111 | Zakynthino                 | 183 | Tempranillo              |
| 40 | Bical               | 112 | Laščina                    | 184 | Verdejo tinto            |
| 41 | Boal Cachudo        | 113 | Pregarc                    | 185 | Zalema                   |
| 42 | Boal Ratinho        | 114 | Trevolina                  | 186 | Aglianico                |
| 43 | Camarate            | 115 | Goli Refošk                | 187 | Albarola                 |
| 44 | Esgana Cão          | 116 | Grganc <sup>a</sup>        | 188 | Avana'                   |
| 45 | Fernão Pires        | 117 | Biancghera                 | 189 | Avarengo                 |
| 46 | Jaen                | 118 | Kanarjola                  | 190 | Barbera                  |
| 47 | Negra Mole          | 119 | Cipra                      | 191 | Barbera bianca           |
| 48 | Periquita           | 120 | Zelen3                     | 192 | Bonarda Piemontese       |
| 49 | Rabo de Ovelha      | 121 | Beli Muškat                | 193 | Bosco                    |
| 50 | Ramisco             | 122 | Rebula stara               | 194 | Brachetto d'Acqui        |
| 51 | Rufete              | 123 | Rebula-100                 | 195 | Cortese                  |
| 52 | Saborinho           | 124 | Istrijanka                 | 196 | Croatina                 |
| 53 | Terrantêz           | 125 | Plavina-maločrn            | 197 | Dolcetto                 |
| 54 | Touriga Nacional    | 126 | Pagadebiti                 | 198 | Erbaluce                 |
| 55 | Trajadura           | 127 | Vitovska                   | 199 | Fiano                    |
| 56 | Trincadeira Preta   | 128 | RdečaX                     | 200 | Grignolino               |
| 57 | Verdelho            | 129 | BeliTeran                  | 201 | Lambrusca di Alessandria |
| 58 | Vinhão              | 130 | Cohova                     | 202 | Malvasia Casorzo         |
| 59 | Viosinho            | 131 | Sladkočrn                  | 203 | Malvasia Schierano       |
| 60 | Vital               | 132 | Rožica                     | 204 | Nebbiolo Lampia          |
| 61 | Babic               | 133 | Duranja                    | 205 | Neiret pinerolese        |
| 62 | Bogdanusa           | 134 | Rečigla <sup>b</sup>       | 206 | Neretta cuneese          |
| 63 | Debit               | 135 | Popetre                    | 207 | Pelaverga Pagno          |
| 64 | Gegic               | 136 | Belina                     | 208 | Quagliano                |
| 65 | Hravatica           | 137 | Glera                      | 209 | Refosco ped. rosso       |
| 66 | Kraljevina Crvena   | 138 | Plavina-Pčavina            | 210 | Sangiovese               |
| 67 | Lasina              | 139 | Plavina-Pregara            | 211 | Teroldego                |
| 68 | Malvazija Istarska  | 140 | Malvasia Istriana          | 212 | Trebbiano toscano        |
| 69 | Mirkovaca           | 141 | Borgonja Bela <sup>c</sup> | 213 | Uva rara                 |
| 70 | Plavec Zuti         | 142 | Rebula                     | 214 | Vermentino               |
| 71 | Plavina             | 143 | Belina Pleterje            | 215 | Vespolina                |
| 72 | Posip               | 144 | Pinela                     |     |                          |

Some synonymic or very closely related varieties were not included in the phenogram:

<sup>a</sup>Grganc = Rebula-100

<sup>b</sup>Rečigla = Rečigla

<sup>c</sup>Borgonja Bela = Malvasia istriana

<sup>d</sup>Zelen 2.4 = Pinela

**Supplemental Data for:**

Štajner, N., D. Rusjan, Z. Korošec-Koruza, and B. Javornik. 2011.

Genetic Characterization of Old Slovenian Grapevine Varieties of *Vitis vinifera* L. by Microsatellite Genotyping  
Am. J. Enol. Vitic. 62:250–255. doi:10.5344/ajev.2011.10011.

**Supplemental Table 2** Likelihood ratios of the probability of the proposed parentages of different cultivars versus other possibilities. Values in parentheses are the cumulative likelihood ratios calculated with 95% upper confidence limits for allele frequencies. The calculations are based on the data of 210 cultivars and seven microsatellite loci. The order of the parents in the table does not indicate the actual direction of the cross.

| Cultivar             | Proposed parents   | Cumulative likelihood ratios of suggested parentage (1)x(2) versus |                      |                           |                      |                           |
|----------------------|--------------------|--------------------------------------------------------------------|----------------------|---------------------------|----------------------|---------------------------|
|                      |                    | XxY <sup>a,b</sup>                                                 | (1)xX <sup>a,c</sup> | rel(2)x(1) <sup>a,d</sup> | (2)xX <sup>a,c</sup> | rel(1)x(2) <sup>a,d</sup> |
| Rožica               | Rebula stara       | 1.07E+04                                                           | 7.10E+01             | 4.87E+00                  | 1.77E+03             | 1.34E+01                  |
|                      | Bosco              | 1.12E+03                                                           | 2.53E+01             | 3.39E+00                  | 5.05E+02             | 9.80E+00                  |
| Rebula stara         | Rheinriesling      | 1.19E+05                                                           | 3.31E+03             | 1.38E+01                  | 3.30E+03             | 1.77E+01                  |
|                      | Biancghera         | 9.68E+03                                                           | 9.46E+02             | 1.02E+01                  | 9.15E+02             | 1.28E+01                  |
| Vitovska Grganja     | Wildbacher Blau    | 1.04E+05                                                           | 1.12E+04             | 1.81E+01                  | 5.17E+02             | 9.86E+00                  |
|                      | Skrlet             | 8.06E+03                                                           | 2.49E+03             | 1.36E+01                  | 1.74E+02             | 7.11E+00                  |
| Zelen2.4             | Rebula stara       | 1.73E+05                                                           | 1.27E+03             | 1.26E+01                  | 4.08E+02             | 8.85E+00                  |
|                      | Vrtovka            | 1.63E+04                                                           | 3.88E+02             | 9.05E+00                  | 1.22E+02             | 6.12E+00                  |
| Biancghera           | Gegic              | 6.63E+04                                                           | 1.62E+02             | 7.29E+00                  | 1.84E+03             | 1.39E+01                  |
|                      | Rebula stara       | 5.61E+03                                                           | 5.79E+01             | 5.18E+00                  | 5.30E+02             | 1.01E+01                  |
| Debit                | Lasina             | 1.31E+08                                                           | 8.88E+04             | 2.58E+01                  | 9.47E+04             | 2.57E+01                  |
|                      | Trevolina          | 4.07E+06                                                           | 1.45E+04             | 1.96E+01                  | 1.79E+04             | 1.99E+01                  |
| Cipro                | Plavec Zuti        | 6.79E+06                                                           | 2.26E+05             | 3.26E+01                  | 1.83E+03             | 1.48E+01                  |
|                      | Malvasia Schierano | 4.03E+05                                                           | 4.04E+04             | 2.53E+01                  | 5.77E+02             | 1.09E+01                  |
| Plavina-maločrn      | Plavec Zuti        | 3.92E+05                                                           | 4.50E+03             | 1.84E+01                  | 2.79E+03             | 1.64E+01                  |
|                      | Vermantino         | 3.64E+04                                                           | 1.30E+03             | 1.36E+01                  | 8.97E+02             | 1.24E+01                  |
| Bela Glera           | Romeiko            | 6.69E+04                                                           | 1.77E+02             | 7.62E+00                  | 1.08E+03             | 1.25E+01                  |
|                      | Glera              | 7.19E+03                                                           | 6.27E+01             | 5.34E+00                  | 3.62E+02             | 9.21E+00                  |
| Plavec Zuti          | Cipro              | 5.08E+04                                                           | 1.69E+03             | 1.22E+01                  | 5.82E+02             | 1.01E+01                  |
|                      | Plavina-maločrn    | 5.31E+03                                                           | 5.33E+02             | 9.02E+00                  | 1.90E+02             | 7.39E+00                  |
| Ranfol               | Rebula stara       | 1.29E+05                                                           | 4.39E+02             | 8.46E+00                  | 3.68E+03             | 1.54E+01                  |
|                      | Glera              | 1.01E+04                                                           | 1.27E+02             | 5.86E+00                  | 9.59E+02             | 1.13E+01                  |
| Glera                | Vitovska           | 4.67E+04                                                           | 1.87E+03             | 1.40E+01                  | 7.55E+02             | 1.10E+01                  |
|                      | Bela Glera         | 4.51E+03                                                           | 5.70E+02             | 1.04E+01                  | 2.27E+02             | 7.82E+00                  |
| Duranja              | Belina             | 9.00E+04                                                           | 5.21E+02             | 1.08E+01                  | 8.00E+03             | 1.90E+01                  |
|                      | Grignolino         | 8.17E+03                                                           | 1.66E+02             | 7.63E+00                  | 2.21E+03             | 1.45E+01                  |
| Vrtovka              | Zelen2.4           | 2.21E+06                                                           | 5.23E+03             | 1.60E+01                  | 1.04E+04             | 2.07E+01                  |
|                      | Klaranca           | 1.71E+05                                                           | 1.29E+03             | 1.16E+01                  | 3.18E+03             | 1.59E+01                  |
| Volovnik             | Poljšakica Lože    | 8.43E+04                                                           | 1.48E+02             | 6.23E+00                  | 5.02E+03             | 1.97E+01                  |
|                      | Pergolin           | 7.31E+03                                                           | 4.91E+01             | 4.30E+00                  | 1.55E+03             | 1.48E+01                  |
| Lambrusca di Alessan | Vitovska Grganja   | 1.24E+06                                                           | 4.07E+03             | 1.40E+01                  | 3.76E+03             | 1.31E+01                  |
|                      | Malvasia Casorzo   | 7.88E+04                                                           | 1.16E+03             | 1.03E+01                  | 8.60E+02             | 9.65E+00                  |

<sup>a</sup>Values in parentheses are the cumulative likelihood ratios calculated with the 95% upper confidence limits for the allele frequencies.

<sup>b</sup>X and Y are random unrelated cultivars.

<sup>c</sup>The identity of one of the suggested parents is assumed and the other parent is unknown.

<sup>d</sup>The identity of one of the suggested parents is assumed and the other parent is a close relative to the second suggested parent.
